# Supplementary material
Source: Springer Nature journal article supplement (https://www.springermedizin.de/resource/supplementary/13075_2012_3667_MOESM3_ESM.pdf/9695072)

Hemocyanin

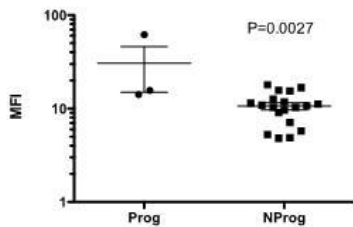

PL-7

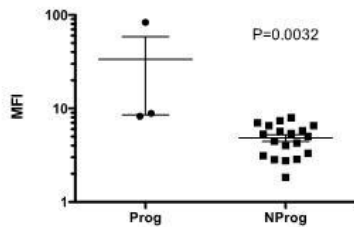

Thyroglobulin

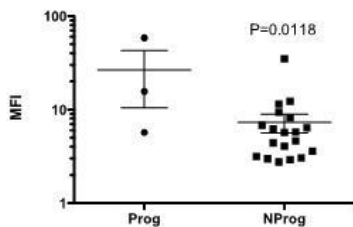

C1q

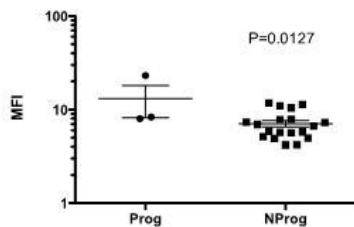

PCNA

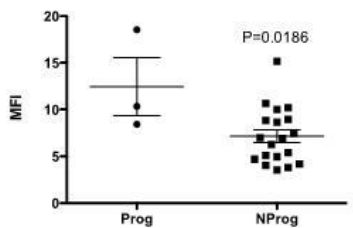 $\beta$ 2 Microglobulin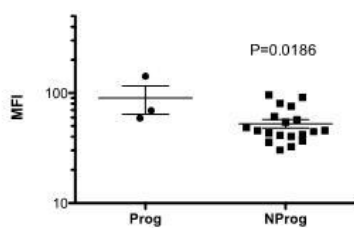

TPO

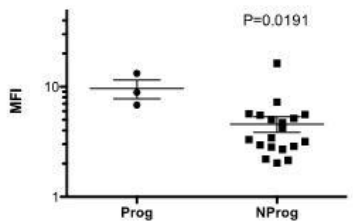

Supplement: MOESM3 [file 9695072]
